# Supplementary material
Source: PubMed Central journal article supplement (PMC2504838)
Supplement: 0805293105_0805293105SI.pdf [file 0805293105_0805293105SI.pdf]

# Supporting Information

Xu et al. 10.1073/pnas.0805293105

## SI Materials and Methods

**Proteins, Viruses, Antibodies, and Surroboodies.** Hemagglutinin protein was purchased from Protein Sciences (H5 Protein A/Vietnam/1203/2004). Inactivated viral vaccine standards for H5N1 rgA/Vietnam/1203/2004 were kindly provided by USFDA-CBER. SLC polyclonal antibodies were generated in rabbits (Covance) immunized with peptides that were predicted to be surface exposed from human VpreB1 sequences (amino acids 61–80) or human  $\lambda 5$  sequences (amino acids 102–119) conjugated to KLH (Elim Biopharmaceuticals).

Mammalian expressed surroboodies or generated by *de novo* synthesis as eukaryotic codon optimized soluble secreted genes (DNA 2.0) and then subcloned into pCI (Promega) for mammalian protein expression, sequence verified, before transfection into CHO-K1 cells (ATCC) according to manufacturers guidelines. Briefly transfections of 80% confluent cells in T-75 flasks were performed using containing equal amounts of desired surrobody chains totaling 32  $\mu\text{g}$  of DNA and Lipofectamine 2000 (Invitrogen) according to manufacturers guidelines. Cells were allowed to produce proteins into 20 ml of Opti-MEM I per transfection. After 4 days the secreted surroboodies were purified from the culture supernatants using nickel chelate chromatography (Ni-NTA agarose, Qiagen). The resulting purified surroboodies were buffer exchanged into sterile PBS using centrifugal size filtration (Centricon Plus-20) and their protein concentrations determined by A280 readings, SDS gel, or Western blot analysis compared to known standards.

**Hemagglutinin and Viral ELISA.** Recombinant HA proteins: H5 Protein A/Vietnam/1203/2004 (Protein Sciences)-100 ng/well; FDA Influenza Virus Vaccine for H5N1 rgA/Vietnam/1203/2004 (CBER)-100 ng/well

ELISA plates were coated as indicated with either recombinant hemagglutinin protein or inactivated virus overnight at room temperature. The next day, plates were appropriately blocked (4% nonfat dry milk in PBS/0.05% Tween-20) and then 0.1 ml samples, diluted in blocking buffer, were incubated, washed, and detected using primary and secondary detection as indicated Absorbance at 450 nm was read, data recorded, and reported herein.

**Phage Library Construction. Surrobody library cloning.** Vectors containing either *E. coli* expression optimized Fusion 1 or Fusion 2 surrogate light chains were digested and gel purified (Qiagen). Heavy chain Vh fragments were obtained from plasmids derived from infecting XL-1Blue cells with Round 2 H5 Vietnam panned, eluted, and amplified phage. Library ligations were performed with 200 ng of Vh inserts and 1  $\mu\text{g}$  of gel purified

Fusion 1 or Fusion 2 vector. The ligations were incubated overnight at 14°C. Ligations were desalted using Edge BioSystem Perfroma spin columns. Six electroporations per library were done in 80  $\mu\text{l}$  TG-1 aliquots, each recovered in 1 ml SOC, pooled and outgrown for 1 hour at 37°C. A sample of each was taken for plating and used to determine the total number of transformants. The remainder was transferred to 250 ml 2YT + 100  $\mu\text{g}/\text{ml}$  Ampicillin + 2% glucose and grown at 37°C to midlog and then superinfected at moi 10:1 with m13K07 helperphage. After 30 min the cells were harvested and resuspended in 2YT + 100  $\mu\text{g}/\text{ml}$  Ampicillin + 70  $\mu\text{g}/\text{ml}$  kanamycin + 0.5 mM IPTG and grown overnight at 30°. Phage were later precipitated with standard PEG/NaCl precipitation technique, resuspended and used directly for panning. Fusion 1 libraries yielded  $3.84 \times 10^7$  transformants and the Fusion 2 libraries yielded  $7.8 \times 10^7$  transformants.

**Panning.** Essentially as described in Reference 1. Notably phage were produced in TG1 cells in overnight incubations in 2-YT media containing ampicillin (100 micrograms/ml) kanamycin (70 micrograms/ml) and 0.5 mM IPTG. Also all washes before low pH elution were repeated a total of five times.

**Surrobody ELISAs.** Essentially as described in ref. 1. Notably detection was accomplished as indicated in the manuscript with the following concentrations of appropriate primary or secondary antibodies. Anti-E HRP conjugated antibody 1:5,000 (Abcam), Anti-His-6 antibody 1:2,500 (Serotec), Anti-Human Ig H+L HRP conjugated antibody 1:5,000 (Jackson Immunologic), Anti-m13 antibody HRP conjugated 1:5,000 (GE Healthcare). Goat anti-mouse HRP conjugated antibodies 1:5,000 (Jackson Immunological)

Notably, for lysate-based ELISAs 1 ml deepwell cultures were grown overnight at 37°C in HB2151 *E. coli*. Cells were harvested and periplasmic lysates prepared using 0.1 volume of BBS buffer (10 mM boric acid, 150 mM NaCl, 10 mM EDTA). For *E. coli* purified proteins some clones were grown overnight at 30° with 0.5 mM IPTG induction.

For surrobody phage-based ELISAs, phage were produced in TG1 *E. coli* grown overnight at 30° with 0.5 mM IPTG induction. Before testing phage were harvested from bacterial cultures supernatants by standard PEG/NaCl precipitation.

**Western Blots.** Detection was accomplished as indicated in the manuscript with the following concentrations of appropriate primary or secondary antibodies. Anti-E HRP conjugated antibody 1:1,000 (Abcam), Anti-His-6 antibody 1:500 (Serotec), Anti-Human Ig H+L HRP conjugated antibody 1:1,000 (Jackson Immunologic), Goat anti-mouse HRP conjugated antibodies 1:1,000 (Jackson Immunological)

1. Barbas C, Burton, DR, Scott, JK, Silverman, GJ (2001) in *Phage Display, A Laboratory Manual* (Cold Spring Harbor Laboratory Press, Plainview, NY).



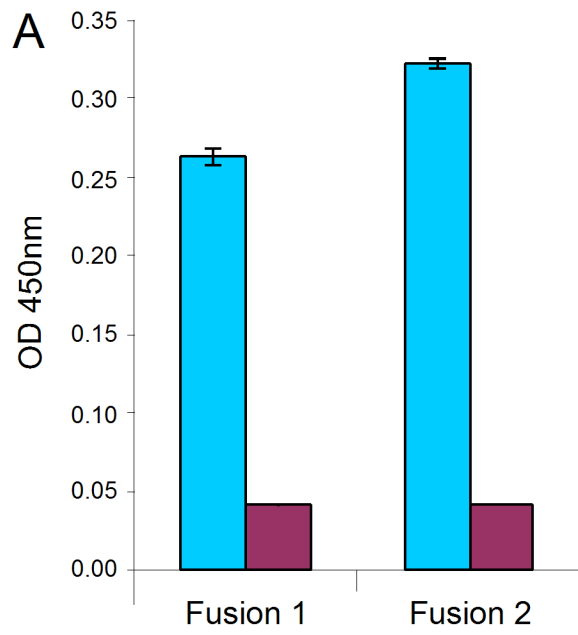

Anti-heavy chain detection

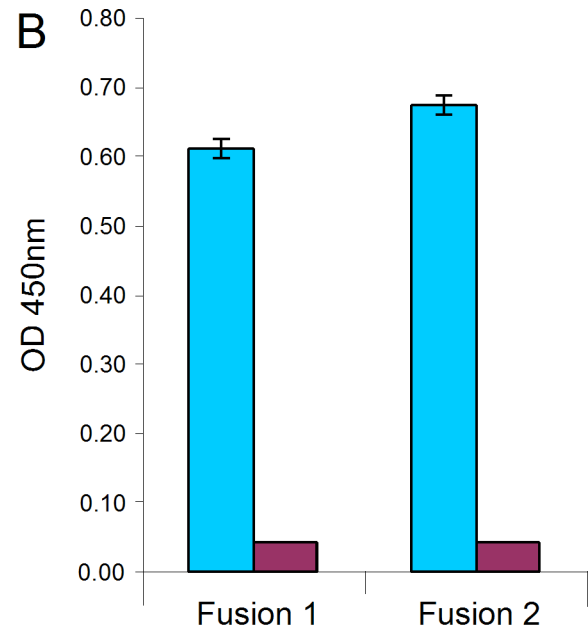

Anti-surrogate light chain epitope detection

**Fig. S2.** Surrobody fusions Fab-like complexes isolated from *E. coli* periplasmic lysates bind antigen. Surrobody antigen binding by either Fusion 1 or Fusion 2 surrobodies were quantitated by detection with anti-His tag (A) and anti-E-tag antibodies (B). Antigen coated wells are indicated by (aqua bars) and uncoated wells are indicated by (purple bars).



Table S1. Surrobodyes derived from known antihemagglutinin heavy chains bind antigen when paired with either SLC fusion and compare favorably to parent Fabs

| Clone                                 | Protein format                                                                                  | H5 affinity<br>(Vietnam 1203/04) |
|---------------------------------------|-------------------------------------------------------------------------------------------------|----------------------------------|
| F5<br>non-neutralizing<br>heavy chain | Parent Fab<br> | 1 nM                             |
|                                       | Fusion 1<br>   | 150 – 270 nM                     |
|                                       | Fusion 2<br>   | 250 – 400 nM                     |
| B11<br>neutralizing<br>heavy chain    | Parent Fab<br> | 13 nM                            |
|                                       | Fusion 1<br>   | 10-21 nM                         |
|                                       | Fusion 2<br>   | 15-22 nM                         |

Affinities were determined from purified *E. coli* produced Fab-like surrobodyes using Biolayer interferometry kinetic analysis (Octet, BioForte) according to the manufacturer's recommended guidelines.

**Table S2. Surrobody libraries containing heavy chain repertoires from H5N1 survivors specifically efficiently enrich unique solutions in H5N1 viral panning regardless of SLC fusion partner**

| Library  | Number of transformants | Round of panning (fold enrichment) | Percent ELISA positive clones, % | Unique sequences |
|----------|-------------------------|------------------------------------|----------------------------------|------------------|
| Fusion 1 | $3.84 \times 10^7$      | 1 (5×)                             | 79                               | 27               |
|          |                         | 2 (97×)                            | 95                               |                  |
| Fusion 2 | $7.80 \times 10^7$      | 1 (20×)                            | 88                               | 27               |
|          |                         | 2 (48×)                            | 99                               |                  |

Unique sequences were generated from analysis of 188 clones total for each fusion library.
